# Supplementary material for: The effects of anthropogenic disturbance and seasonality on the ant communities of Lang Tengah Island
Source: PeerJ. 2023 Oct 18;11:e16157. doi: 10.7717/peerj.16157 (PMC10590099; doi:10.7717/peerj.16157)
Supplement: Table S1 — Pitfall traps were placed at two disturbed sites—Sari Pacifica Resort (SP) and D’Coconut Resort (DC). Pitfall traps were also placed at two undisturbed sites—Turtle Bay Forest (TB) and Batu Kuching (BK). Second column denotes the functional groups these ant species were categorized under. Third column denotes the voucher specimen number for ants deposited at Institute for Tropical Biology and Conservation (ITBC), Universiti Malaysia Sabah (UMS). [file peerj-11-16157-s001.xlsx]

## Sheet: Sheet 1 - PeerJ_Suppl1
Supplementary Table S1: Species x Sites Matrix of ants species collected from pitfall traps at Lang Tengah Island pre-monsoon (26th September to 3rd October 2020) and post-monsoon (2nd to 9th March 2020). Pitfall traps were placed at two disturbed sites - Sari Pacifica Resort (SP) and D'Coconut Resort (DC). Pitfall traps were also placed at two undisturbed sites - Turtle Bay Forest (TB) and Batu …
Disturbed/Undisturbed	Functional Groups	Voucher Specimen Number	Undisturbed	Undisturbed	Undisturbed	Undisturbed	Undisturbed	Undisturbed	Undisturbed	Undisturbed	Undisturbed	Undisturbed	Undisturbed	Undisturbed	Undisturbed	Undisturbed	Undisturbed	Undisturbed	Undisturbed	Undisturbed	Undisturbed	Undisturbed	Undisturbed	Undisturbed	Undisturbed	Undisturbed	Undisturbed	Undisturbed	Undisturbed	Undisturbed	Undisturbed	Undisturbed	Undisturbed	Undisturbed	Undisturbed	Undisturbed	Undisturbed	Undisturbed	Undisturbed	Undisturbed	Undisturbed	Undisturbed	Disturbed	Disturbed	Disturbed	Disturbed	Disturbed	Disturbed	Disturbed
Site			TB	TB	TB	TB	TB	TB	TB	TB	TB	TB	TB	TB	TB	TB	TB	TB	TB	TB	TB	TB	BK	BK	BK	BK	BK	BK	BK	BK	BK	BK	BK	BK	BK	BK	BK	BK	BK	BK	BK	BK	DC	DC	DC	DC	DC	DC	DC
Monsoon			Post	Post	Post	Post	Post	Post	Post	Post	Post	Post	Post	Post	Post	Post	Post	Post	Post	Post	Post	Post	Post	Post	Post	Post	Post	Post	Post	Post	Post	Post	Post	Post	Post	Post	Post	Post	Post	Post	Post	Post	Post	Post	Post	Post	Post	Post	Post
Replicate			1	2	3	4	5	6	7	8	9	10	11	12	13	14	15	16	17	18	19	20	1	2	3	4	5	6	7	8	9	10	11	12	13	14	15	16	17	18	19	20	1	2	3	4	5	6	7
Paratrechina longicornis	OPP	HYM0003796	12	9	7	9	8	4	2	3	5	11	4	7	10	8	3		2	4	4	2	2	1	1	3		13	9	6	4	5	3	3	1			6	2			1
Tetramorium sp.III	OPP	HYM0003797	5	34	16	3	10	17	15	1	2	5	43	22		2	39		2	1	12
Tetramorium insolens	OPP	HYM0003798			1								3			1	15		1					1	1					2					1									1	1
Tetramorium sp. I	OPP	HYM0003799						1				3			3	6			5	30	20	17
Dolichoderus sp.	DD	HYM0003800									2		11	2		2							6				1		1
Tetramorium sp. II	OPP	HYM0003801										1											1	1									2	1
Camponotus sp.	SC	HYM0003802											1
Amblyopone sp.	SP	HYM0003803													3
Carebara sp. I	CRY	HYM0003804																										3											1			3
Monomorium sp.	GM	HYM0003805																																				1
Pheidole sp. III	GM	HYM0003807																																									10			6			1
Tapinoma indicum	OPP	HYM0003808																																									3		1		19	7	63
Monomorium pharaonis	GM	HYM0003809																																										1		5	8	8	31
Carebara sp. II	CRY	HYM0003810																																											1
Paraparatrechina sp.	OPP	HYM0003811																																												3	7	2	4
Pheidole sp. IV	GM	HYM0003812
Anoplolepis gracilipes	OPP	HYM0003813
Cardiocondyla kagutsuchi	OPP	HYM0003814
Plagiolepis sp.	CRY	HYM0003815
Pheidole sp. II	GM	HYM0003816
Hypoponera sp. I	CRY	HYM0003817
Pheidole sp. I	GM	HYM0003818
Cardiocondyla tjibodana	OPP	HYM0003819
Monomorium floricola	GM	HYM0003820
Meranoplus bicolor	HCS	HYM0003821
Hypoponera sp. II	CRY	HYM0003822
Aphaenogaster sp.	OPP	HYM0003823
Leptogenys sp.	SP	HYM0003824
Camponotus sp.	SC	HYM0003825
Cardiocondyla sp.	OPP	HYM0003826
[truncated: 113 more columns]
