# Supplementary material for: The effects of anthropogenic disturbance and seasonality on the ant communities of Lang Tengah Island
Source: PeerJ. 2023 Oct 18;11:e16157. doi: 10.7717/peerj.16157 (PMC10590099; doi:10.7717/peerj.16157)
Supplement: Table S2 — (A) Species diversity from each site—Sari Pacifica Resort (SP), D’Coconut Resort (DC), Batu Kuching (BK), and Turtle Bay Forest (TB) and season (pre-monsoon 26th September to 3rd October 2020; post-monsoon 2nd to 9th March 2020). (B) Species diversity of Lang Tengah Island at Undisturbed (BK and TB) and Disturbed (SP and DC) sites according to seasonality (pre- and post-monsoon). (C) Species diversity of Lang Tengah Island at Undisturbed (BK and TB) and Disturbed (SP and DC) with seasonality combined. [file peerj-11-16157-s002.xlsx]

## Sheet: Sheet1
Supplementary Table S2: Observed and Estimated species richness, and Shannon and Simpson diversity indexes on epigeic ants on Lang Tengah Island.
(A) Species diversity from each site - Sari Pacifica Resort (SP), D’Coconut Resort (DC), Batu Kuching (BK), and Turtle Bay Forest (TB) and season (pre-monsoon 26th September to 3rd October 2020; post-monsoon 2nd to 9th March 2020).
Habitat	Site	Monsoon	Index	Observed	Estimated
Undisturbed	BK	Post	Species richness	8	10.85
Undisturbed	BK	Post	Shannon diversity	5.086	5.523
Undisturbed	BK	Post	Simpson diversity	4.137	4.218
Undisturbed	TB	Post	Species richness	7	7.95
Undisturbed	TB	Post	Shannon diversity	4.727	5.322
Undisturbed	TB	Post	Simpson diversity	3.469	3.641
Undisturbed	BK	Pre	Species richness	12	14.533
Undisturbed	BK	Pre	Shannon diversity	7.499	8.449
Undisturbed	BK	Pre	Simpson diversity	5.812	6.091
Undisturbed	TB	Pre	Species richness	17	20.958
Undisturbed	TB	Pre	Shannon diversity	12.095	13.649
Undisturbed	TB	Pre	Simpson diversity	10.031	10.81
Disturbed	SP	Post	Species richness	7	9.85
Disturbed	SP	Post	Shannon diversity	4.847	5.445
Disturbed	SP	Post	Simpson diversity	4.213	4.422
Disturbed	DC	Post	Species richness	5	5.95
Disturbed	DC	Post	Shannon diversity	3.694	4.309
Disturbed	DC	Post	Simpson diversity	3.085	3.365
Disturbed	SP	Pre	Species richness	6	6.475
Disturbed	SP	Pre	Shannon diversity	4.587	5.126
Disturbed	SP	Pre	Simpson diversity	3.756	4.06
Disturbed	DC	Pre	Species richness	11	11.95
Disturbed	DC	Pre	Shannon diversity	8.461	9.252
Disturbed	DC	Pre	Simpson diversity	7.172	7.172
(B) Species diversity of Lang Tengah Island at Undisturbed (BK and TB) and Disturbed (SP and DC) sites according to seasonality (pre- and post-monsoon).
Habitat	Monsoon	Index	Observed	Estimated
Undisturbed	Post	Species richness	11	16..850
Undisturbed	Post	Shannon diversity	6.226	6.815
Undisturbed	Post	Simpson diversity	4.513	4.613
Undisturbed	Pre	Species richness	23	30.8
Undisturbed	Pre	Shannon diversity	13.467	15.07
Undisturbed	Pre	Simpson diversity	10.118	10.599
Disturbed	Post	Species richness	9	11.925
Disturbed	Post	Shannon diversity	5.921	6.55
Disturbed	Post	Simpson diversity	4.751	4.984
Disturbed	Pre	Species richness	13	13.244
Disturbed	Pre	Shannon diversity	9.918	10.658
Disturbed	Pre	Simpson diversity	8.25	8.849
(C) Species diversity of Lang Tengah Island at Undisturbed (BK and TB) and Disturbed (SP and DC) with seasonality combined.
Habitat	Index	Observed	Estimated
Undisturbed	Species richness	28	43.8
Undisturbed	Shannon diversity	17.356	19.049
Undisturbed	Simpson diversity	13.302	13.915
Disturbed	Species richness	20	23.95
Disturbed	Shannon diversity	14.105	15.364
Disturbed	Simpson diversity	11.539	12.334
